# Supplementary material for: Quantification of fossil fuel CO 2 from combined CO, δ 13 CO 2 and Δ 14 CO 2 observations
Source: Copernicus journal article supplement (doi:10.5194/acp-23-14425-2023), 2023-11-22
Supplement: Supplementary file 1 [file acp-23-14425-2023-supplement.pdf]

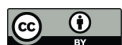

*Supplement of*

## **Quantification of fossil fuel CO<sub>2</sub> from combined CO, $\delta^{13}\text{CO}_2$ and $\Delta^{14}\text{CO}_2$ observations**

**Jinsol Kim et al.**

*Correspondence to:* Jinsol Kim (jinsolki@usc.edu)

The copyright of individual parts of the supplement might differ from the article licence.

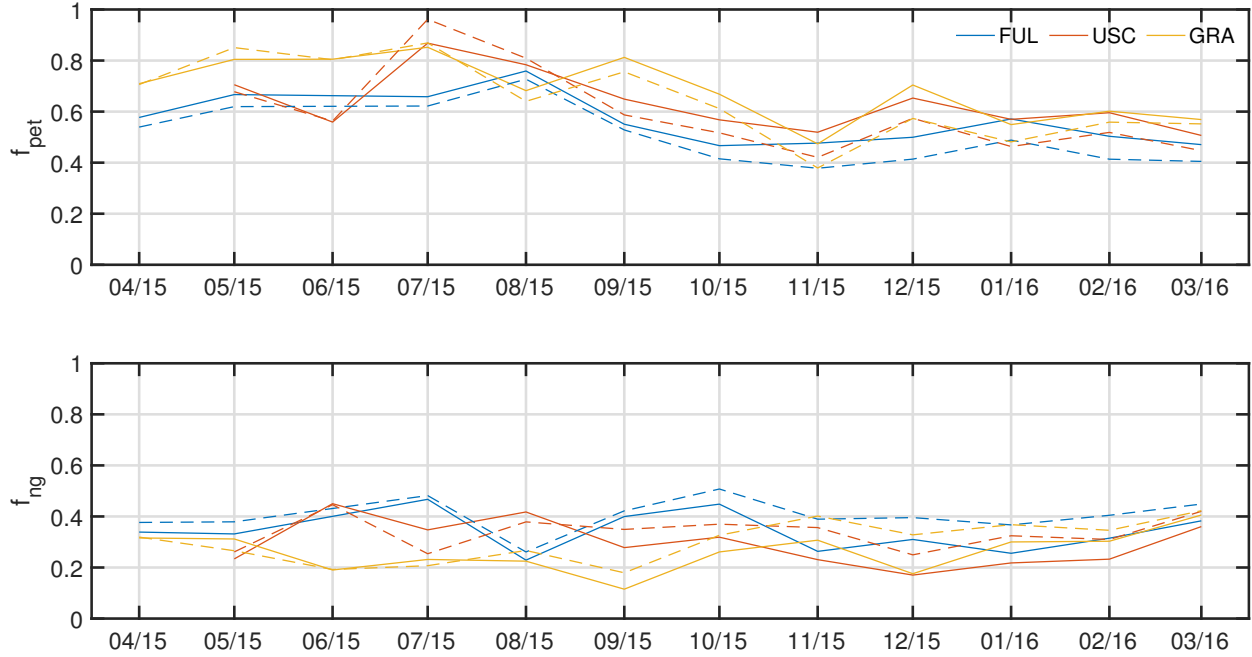

**Figure S1.** Sensitivity of  $f_{pet}$  and  $f_{ng}$  ( $C_{pet}/C_{xs}$  and  $C_{ng}/C_{xs}$ ) to assuming  $\delta_{bio}$  value. Solid line represents  $f_{pet}$  and  $f_{ng}$  calculated using  $\delta_{bio} = -26.6$  ‰ and the dashed line represents  $\delta_{bio} = -20$  ‰.  $f_{pet}$  changes from  $0.62 \pm 0.13$  to  $0.58 \pm 0.15$  (annual mean and standard deviation of monthly mean fraction),  $f_{ng}$  changes from  $0.30 \pm 0.08$  to  $0.35 \pm 0.08$ .

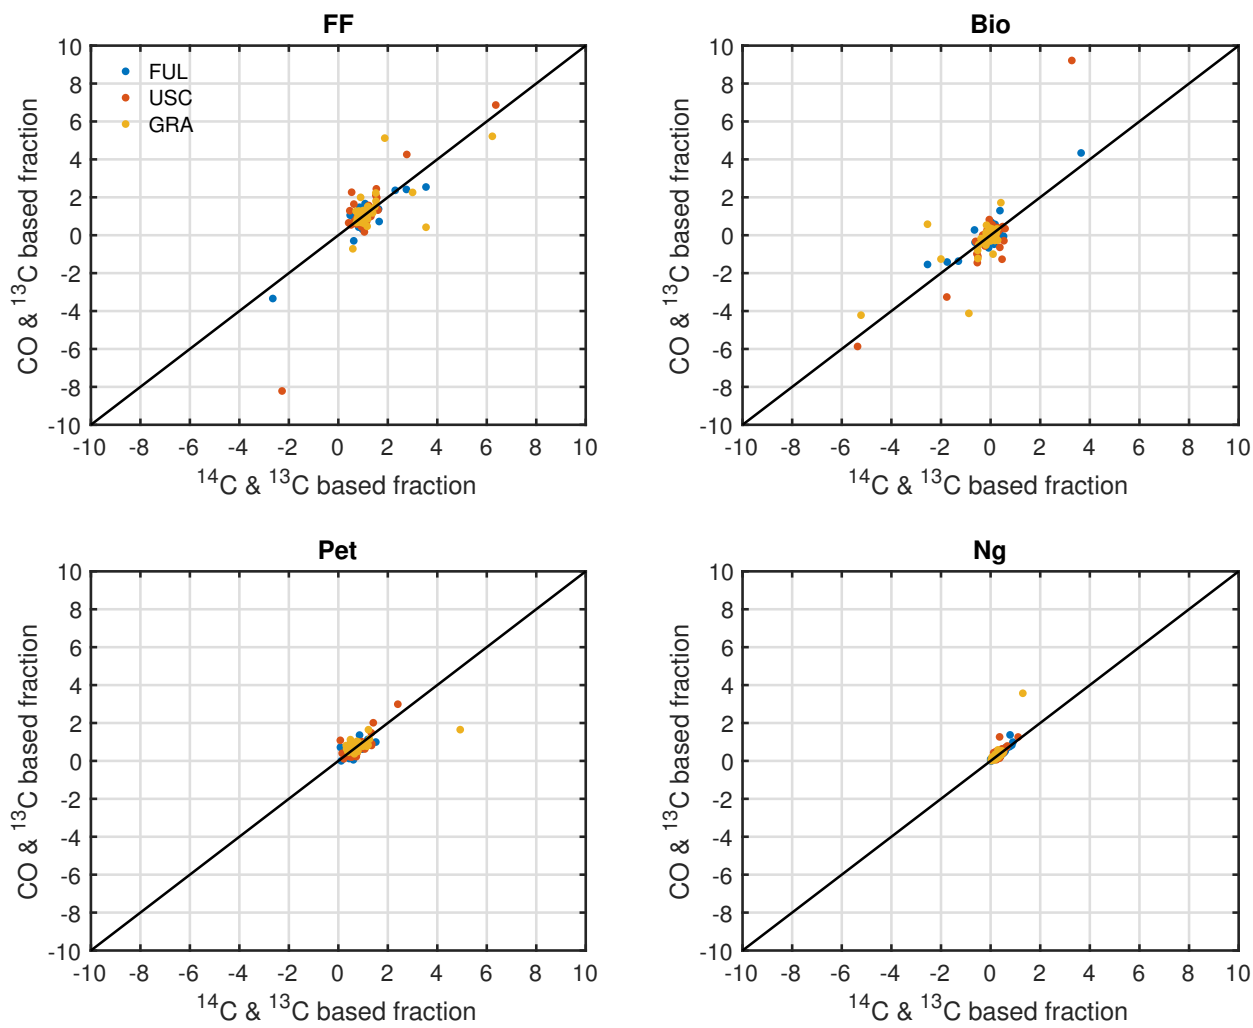

**Figure S2.** Comparison of  $f$  and  $f'$  values for each source. Black lines represent 1:1 relationships and different colors indicate different sites.

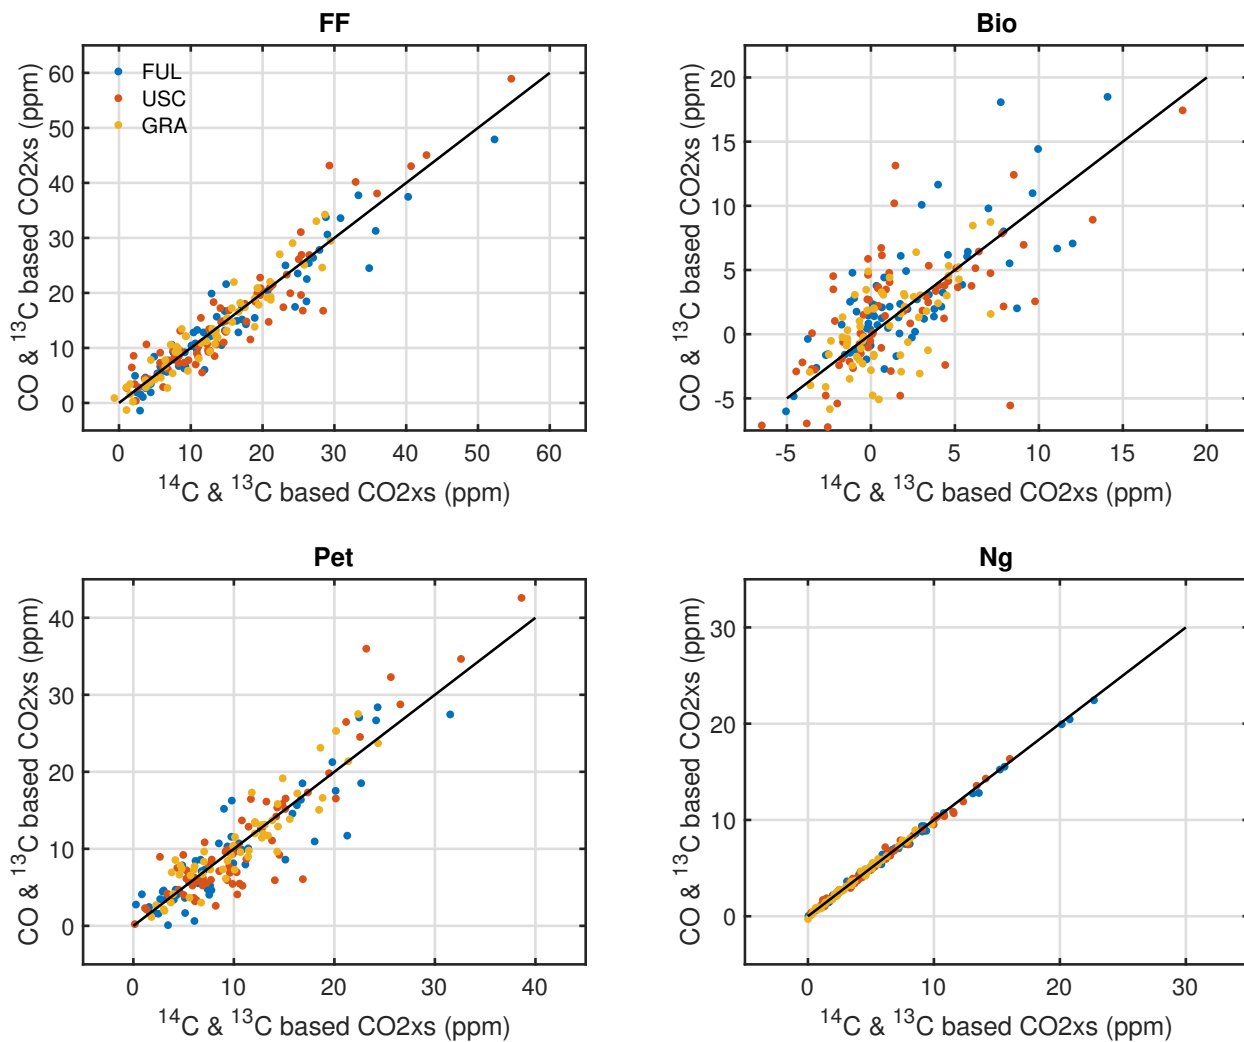

**Figure S3.** Comparison of  $C$  and  $C'$  values for each source. Black lines represent 1:1 relationships and different colors indicate different sites.

**Table S1.** Monthly mean fractional contributions (f) of biosphere (green), petroleum (red), and natural gas (yellow) to CO<sub>2</sub>xs at each site, as determined from  $\Delta^{14}\text{C}$  and  $\delta^{13}\text{C}$  observations (Section 2.2). The sum of the fractions is one in each month.

| Month  | FUL   |      |      | USC   |      |      | GRA   |      |      |
|--------|-------|------|------|-------|------|------|-------|------|------|
|        | Bio   | Pet  | NG   | Bio   | Pet  | NG   | Bio   | Pet  | NG   |
| Apr 15 | 0.08  | 0.58 | 0.34 |       |      |      | -0.03 | 0.71 | 0.32 |
| May15  | 0.00  | 0.67 | 0.33 | 0.06  | 0.71 | 0.23 | -0.11 | 0.80 | 0.31 |
| Jun15  |       |      |      | -0.01 | 0.56 | 0.45 | 0.00  | 0.81 | 0.19 |
| Jul15  | -0.13 | 0.66 | 0.47 | -0.22 | 0.87 | 0.35 | -0.08 | 0.85 | 0.23 |
| Aug15  | 0.01  | 0.76 | 0.23 | -0.20 | 0.78 | 0.42 | 0.09  | 0.68 | 0.23 |
| Sep15  | 0.05  | 0.55 | 0.40 | 0.07  | 0.65 | 0.28 | 0.07  | 0.81 | 0.12 |
| Oct15  | 0.08  | 0.47 | 0.45 | 0.11  | 0.57 | 0.32 | 0.07  | 0.67 | 0.26 |
| Nov15  | 0.26  | 0.48 | 0.26 | 0.25  | 0.52 | 0.23 | 0.22  | 0.47 | 0.31 |
| Dec15  | 0.19  | 0.50 | 0.31 | 0.18  | 0.65 | 0.17 | 0.12  | 0.70 | 0.18 |
| Jan16  | 0.17  | 0.57 | 0.26 | 0.21  | 0.57 | 0.22 | 0.15  | 0.55 | 0.30 |
| Feb16  | 0.18  | 0.50 | 0.32 | 0.17  | 0.60 | 0.23 | 0.10  | 0.60 | 0.30 |
| Mar16  | 0.15  | 0.47 | 0.38 | 0.13  | 0.51 | 0.36 | 0.03  | 0.57 | 0.40 |
